# Supplementary material for: ApoE Mimetic Peptide COG1410 Kills Mycobacterium smegmatis via Directly Interfering ClpC’s ATPase Activity
Source: MDPI journal article supplement (doi:10.3390/antibiotics13030278), 2024-03-19
Supplement: s1 [file s1]

**Table S1.** Strains and plasmids used in this study.

| Strain or Plasmid                                   | Genotypes or Relative Characteristics                                             | References or Sources |
|-----------------------------------------------------|-----------------------------------------------------------------------------------|-----------------------|
| <b>Strains</b>                                      |                                                                                   |                       |
| <i>Mycobacterium smegmatis</i> MC <sup>2</sup> -155 | the wild-type strain (WT)                                                         | lab storage           |
| 30g                                                 | spontaneous mutant of <i>M. smegmatis</i> , COG1410 sensitive                     | this study            |
| 35g                                                 | spontaneous mutant of <i>M. smegmatis</i> , COG1410 resistant                     | this study            |
| 35g/pSMT3-clpC                                      | expression of ClpC in 35g strain, hygromycin resistant                            | this study            |
| 35g/pSMT3-clpC (S437P)                              | expression of ClpC (S437P) in 35g strain, hygromycin resistant                    | this study            |
| <i>clpC</i> (KD)                                    | <i>clpC</i> knockdown strain in <i>M. smegmatis</i>                               | [1]                   |
| <i>clpC</i> (KD)/pSMT3                              | <i>clpC</i> knockdown strain containing empty vector, hygromycin resistant        | this study            |
| <i>clpC</i> (KD)/pSMT3-clpC                         | expressing ClpC in the <i>clpC</i> knockdown strain, hygromycin resistant         | this study            |
| <i>clpC</i> (KD)/pSMT3-clpC (S437P)                 | expressing ClpC (S437P) in the <i>clpC</i> knockdown strain, hygromycin resistant | this study            |
| WT/pSMT3                                            | the wild-type strain containing empty vector, hygromycin resistant                | this study            |
| WT/pSMT3-clpC                                       | overexpression of ClpC in the wild-type strain, hygromycin resistant              | this study            |
| <b>Plasmids</b>                                     |                                                                                   |                       |
| pSMT3                                               | shuttle vector for mycobacteria, hygromycin resistant                             | [2]                   |
| pSMT3-clpC                                          | ClpC expression vector in mycobacteria, hygromycin resistant                      | this study            |
| pSMT3-clpC (S437P)                                  | ClpC (S437P) expression vector in mycobacteria, hygromycin resistant              | this study            |
| pSMT3-clpC-mCherry                                  | expression vector of ClpC-mCherry fusion protein, hygromycin resistant            | this study            |
| pSMT3-P'clpC-mCherry                                | clpC promoter reporter plasmid, hygromycin resistant                              | this study            |
| pET15b                                              | protein expression vector, ampicillin resistant                                   | lab storage           |
| pET15b-clpC                                         | His-tagged ClpC expression vector, ampicillin resistant                           | this study            |
| pET15b-clpP1                                        | His-tagged ClpP1 expression vector, ampicillin resistant                          | this study            |
| pET15b-clpP2                                        | His-tagged ClpP2 expression vector, ampicillin resistant                          | this study            |

- 1 Bai, J.-C.; Chi, M.-Z.; Hu, Y.-W.; Hao, M.; Hao, X.-L. Construction and Biological Characteristics of ClpC and ClpX Knock-down Strains in *Mycobacterium smegmatis*. *China Biotechnol.* **2021**, *41*, 13–22
- 2 Carroll, P.; Schreuder, L.J.; Muwanguzi-Karugaba, J.; Wiles, S.; Robertson, B.D.; Ripoll, J.; Parish, T. Sensitive detection of gene expression in mycobacteria under replicating and non-replicating conditions using optimized far-red reporters. *PLoS ONE* **2010**, *5*, e9823.
