# Supplementary material for: ApoE Mimetic Peptide COG1410 Kills Mycobacterium smegmatis via Directly Interfering ClpC’s ATPase Activity
Source: Antibiotics (Basel). 2024 Mar 19;13(3):278. doi: 10.3390/antibiotics13030278 (PMC10967448; doi:10.3390/antibiotics13030278)
Supplement: Supplementary file 1 [file antibiotics-13-00278-s001.zip]

Archive with 6 entries (6 files):
- Figure S1. KEGG analysis of DEGs affected by COG1410 in M. smegmatis..pdf
- Table S1. Strains and plasmids in this study..pdf
- Table S2. Primers used in this study.xlsx
- Table S3. InDel differences between the wild-type strain and induced mutants.xlsx
- Table S4. SNP differences between the wild-type strain and induced mutants.xlsx
- Table S5. Transcriptome analysis of M. smegmatis treated with sub-MIC COG1410..xlsx
