# Supplementary material for: ApoE Mimetic Peptide COG1410 Kills Mycobacterium smegmatis via Directly Interfering ClpC’s ATPase Activity
Source: Antibiotics (Basel). 2024 Mar 19;13(3):278. doi: 10.3390/antibiotics13030278 (PMC10967448; doi:10.3390/antibiotics13030278)
Supplement: Supplementary file 1 [file antibiotics-13-00278-s001.zip › Table S2. Primers used in this study.xlsx]

## Sheet: Sheet1
Primers	Sequences	Purpose
clpC-F	agacaattgcggatcATGTTTGAGAGATTTACCGAC	ampification of clpC and clpC (S437P)
clpC-R	cggtatcgataagctTCACTCCGTGCCTGCGGTC
SCN-SMT3-F	AACGTTGGCACTCGCGACC	screening for recombinant plasmid
SCN-SMT3-R	TGCTTGTCTCCGAATCCAAC
P-clpC-F	tggcggccgctctag CGACGAAACGGTGGAATTC	ampification of the promoter region of clpC
P-clpC-R	gcccttgctcaccat CGGTGGTTACCTGCTTCCATC
clpC-mCherry-F	accgcaggcacggagATGGTGAGCAAGGGCGAGG	ampification of codon optimized mCherry
clpC-mCherry-R	cggtatcgataagct TTACTTGTACAGCTCGTCCATG
SCN-SMT3-F3	GCTGGCACGACAGGTTTCC	screening for recombinant plasmid
SCN-SMT3-R	TGCTTGTCTCCGAATCCAAC
28a-ClpC-F	cgcgcggcagccata TG TTTGAGAGATTTACCGAC	ampification of clpC and clpC (S437P)
28a-ClpC-R	gctcgaattcggatcc TCACTCCGTGCCTGCGGTC
28a-P1-F	cgcgcggcagccata TGCGTGGCACCGGGCAG	ampification of clpP1
28a-P1-R	gctcgaattcggatcc TCATTTGTCTAGTCCTGCTCC
28a-P2-F	cgcgcggcagccata TGAGCAACATTCATCCGTC	ampification of clpP2
28a-P2-R	gctcgaattcggatccTTACGACGTCTGCGCAGAGAG
q-clpC-F	GAAGGCCCACCAGGAGATCT	qRT-PCR for clpC mRNA
q-clpC-R	TCGAGATGTCGGACGTGCCGA
q-M.s 16S-F	CGAGCGTTGTCCGGAATTA	qRT-PCR for M. smegmatis 16S mRNA
q-M.s 16S-R	TCCACCGCTACACCAGGAAT
