# Supplementary material for: ApoE Mimetic Peptide COG1410 Kills Mycobacterium smegmatis via Directly Interfering ClpC’s ATPase Activity
Source: Antibiotics (Basel). 2024 Mar 19;13(3):278. doi: 10.3390/antibiotics13030278 (PMC10967448; doi:10.3390/antibiotics13030278)
Supplement: Supplementary file 1 [file antibiotics-13-00278-s001.zip › Table S3. InDel differences between the wild-type strain and induced mutants.xlsx]

## Sheet: Indel 差异
chr_id	position	type	base	Annotation_type	pos_start	pos_end	strand	gene_id-30g	gene_id-35g
NC_008596.1	224263	I1	C	CDS	223997	224775	+	MSMEG_RS00980	MSMEG_RS00980
NC_008596.1	342422	I1	C	CDS	341951	342714	-	MSMEG_RS01530	MSMEG_RS01530
NC_008596.1	455075	I1	C	CDS	447897	458191	+	MSMEG_RS01970	MSMEG_RS01970
NC_008596.1	574124	I1	T	CDS	574037	574849	-	MSMEG_RS02410	MSMEG_RS02410
NC_008596.1	601370	I1	C	CDS	601359	601814	-	MSMEG_RS33740	MSMEG_RS33740
NC_008596.1	712118	I1	T	CDS	712068	713446	-	MSMEG_RS03070	MSMEG_RS03070
NC_008596.1	735249	I1	C	CDS	734605	735426	+	MSMEG_RS03175	MSMEG_RS03175
NC_008596.1	809982	I1	G	CDS	809823	810451	+	MSMEG_RS03520	MSMEG_RS03520
NC_008596.1	858551	I1	C	CDS	858306	859402	+	MSMEG_RS03775	MSMEG_RS03775
NC_008596.1	925689	D1	C	CDS	925636	926928	-	MSMEG_RS04100	MSMEG_RS04100
NC_008596.1	1447976	I1	T	CDS	1447333	1448336	-	MSMEG_RS06610	MSMEG_RS06610
NC_008596.1	1499493	D1	C	CDS	1499217	1501323	+	MSMEG_RS06840	MSMEG_RS06840
NC_008596.1	1639377	I1	A	CDS	1639323	1640899	+	MSMEG_RS07570	MSMEG_RS07570
NC_008596.1	1902241	I1	C	CDS	1902184	1903262	+	MSMEG_RS08875	MSMEG_RS08875
NC_008596.1	1918526	I1	G	CDS	1917272	1918728	+	MSMEG_RS08955	MSMEG_RS08955
NC_008596.1	1930853	I1	A	CDS	1930787	1931401	-	MSMEG_RS33850	MSMEG_RS33850
NC_008596.1	2055796	D1	G	CDS	2055543	2056650	+	MSMEG_RS09575	MSMEG_RS09575
NC_008596.1	2108866	D1	G	CDS	2108135	2108896	-	MSMEG_RS09845	MSMEG_RS09845
NC_008596.1	2119301	D1	T	CDS	2118840	2119956	-	MSMEG_RS09905	MSMEG_RS09905
NC_008596.1	2162053	D1	G	CDS	2161613	2162981	-	MSMEG_RS10120	MSMEG_RS10120
NC_008596.1	2221312	I1	C	CDS	2221081	2221323	+	MSMEG_RS10415	MSMEG_RS10415
NC_008596.1	2223894	I1	C	CDS	2222787	2224376	+	MSMEG_RS10425	MSMEG_RS10425
NC_008596.1	2290857	D1	G	CDS	2290327	2291515	+	MSMEG_RS10725	MSMEG_RS10725
NC_008596.1	2425504	D1	C	CDS	2425365	2425713	-	MSMEG_RS11350	MSMEG_RS11350
NC_008596.1	2448851	D1	A	CDS	2447932	2448964	+	MSMEG_RS11460	MSMEG_RS11460
NC_008596.1	2595689	I1	G	CDS	2595151	2596268	+	MSMEG_RS12175	MSMEG_RS12175
NC_008596.1	2600622	I1	G	CDS	2599455	2601154	-	MSMEG_RS12195	MSMEG_RS12195
NC_008596.1	2799283	I1	C	CDS	2798872	2799497	+	MSMEG_RS13235	MSMEG_RS13235
NC_008596.1	2816525	I1	G	CDS	2815547	2816568	-	MSMEG_RS13305	MSMEG_RS13305
NC_008596.1	2816642	D1	C	CDS	2816586	2817632	-	MSMEG_RS13310	MSMEG_RS13310
NC_008596.1	2818459	I1	T	CDS	2817813	2818490	+	MSMEG_RS13315	MSMEG_RS13315
NC_008596.1	3053027	I1	T	CDS	3052885	3053973	-	MSMEG_RS14505	MSMEG_RS14505
NC_008596.1	3105783	I2	GT	CDS	3104718	3105851	+	MSMEG_RS14730	MSMEG_RS14730
NC_008596.1	3109208	I2	GC	CDS	3108872	3111491	+	MSMEG_RS14755	MSMEG_RS14755
NC_008596.1	3262873	D1	T	CDS	3261518	3263795	-	MSMEG_RS15465	MSMEG_RS15465
NC_008596.1	3313338	D1	C	CDS	3311941	3313483	-	MSMEG_RS15690	MSMEG_RS15690
NC_008596.1	3328242	D3	GCC	CDS	3327566	3328519	+	MSMEG_RS15765	MSMEG_RS15765
NC_008596.1	3419168	D1	C	CDS	3418936	3419235	+	MSMEG_RS16240	MSMEG_RS16240
NC_008596.1	3485876	D1	G	CDS	3485603	3485981	+	MSMEG_RS16600	MSMEG_RS16600
NC_008596.1	3580028	I1	C	CDS	3579014	3580091	+	MSMEG_RS17080	MSMEG_RS17080
NC_008596.1	3811888	I1	G	CDS	3811821	3812761	-	MSMEG_RS18160	MSMEG_RS18160
NC_008596.1	3815277	I1	C	CDS	3814080	3815851	-	MSMEG_RS18170	MSMEG_RS18170
NC_008596.1	3902348	D1	T	CDS	3902141	3903270	-	MSMEG_RS18580	MSMEG_RS18580
NC_008596.1	3902501	D1	T	CDS	3902141	3903270	-	MSMEG_RS18580	MSMEG_RS18580
NC_008596.1	3940864	D1	A	CDS	3940595	3941546	-	MSMEG_RS18745	MSMEG_RS18745
NC_008596.1	3961906	D1	C	CDS	3961466	3962462	-	MSMEG_RS18855	MSMEG_RS18855
NC_008596.1	4021910	D1	A	CDS	4021854	4022955	-	MSMEG_RS19160	MSMEG_RS19160
NC_008596.1	4030215	D1	T	CDS	4029539	4030411	+	MSMEG_RS19190	MSMEG_RS19190
NC_008596.1	4042390	D1	C	CDS	4041018	4043082	-	MSMEG_RS19245	MSMEG_RS19245
NC_008596.1	4052479	D1	A	CDS	4052360	4053208	-	MSMEG_RS19295	MSMEG_RS19295
NC_008596.1	4132877	D1	G	CDS	4132099	4133034	+	MSMEG_RS19655	MSMEG_RS19655
NC_008596.1	4255056	D1	C	CDS	4255008	4255647	+	MSMEG_RS20210	MSMEG_RS20210
NC_008596.1	4255790	I1	T	CDS	4255613	4256982	-	MSMEG_RS20215	MSMEG_RS20215
NC_008596.1	4288666	I1	C	CDS	4286460	4290514	-	MSMEG_RS20355	MSMEG_RS20355
NC_008596.1	4297753	I1	T	CDS	4296613	4297820	+	MSMEG_RS20390	MSMEG_RS20390
NC_008596.1	4561974	D1	G	CDS	4561717	4562005	-	MSMEG_RS21650	MSMEG_RS21650
NC_008596.1	4637301	D1	G	CDS	4636658	4637311	-	MSMEG_RS34010	MSMEG_RS34010
NC_008596.1	4715581	I1	C	CDS	4714304	4715712	-	MSMEG_RS22340	MSMEG_RS22340
NC_008596.1	4715714	I1	T	CDS	4715714	4718369	-	MSMEG_RS22345	MSMEG_RS22345
NC_008596.1	4715872	D1	A	CDS	4715714	4718369	-	MSMEG_RS22345	MSMEG_RS22345
NC_008596.1	5213126	D1	G	CDS	5212808	5213160	-	MSMEG_RS24655	MSMEG_RS24655
NC_008596.1	5213084	D1	G	CDS	5212808	5213160	-	MSMEG_RS24655	MSMEG_RS24655
NC_008596.1	5493872	I1	C	CDS	5493872	5494549	-	MSMEG_RS33700	MSMEG_RS33700
NC_008596.1	5498837	D1	G	CDS	5497775	5498948	+	MSMEG_RS26105	MSMEG_RS26105
NC_008596.1	5644780	I1	T	CDS	5644293	5645176	+	MSMEG_RS26770	MSMEG_RS26770
NC_008596.1	5682472	I1	T	CDS	5682026	5683654	-	MSMEG_RS26960	MSMEG_RS26960
NC_008596.1	5855980	D1	A	CDS	5855822	5856710	-	MSMEG_RS27875	MSMEG_RS27875
NC_008596.1	5874054	D1	C	CDS	5873134	5874081	+	MSMEG_RS27980	MSMEG_RS27980
NC_008596.1	6078399	I1	T	CDS	6077072	6078624	+	MSMEG_RS28990	MSMEG_RS28990
NC_008596.1	6112077	I1	G	CDS	6111320	6112420	-	MSMEG_RS29140
NC_008596.1	6600596	I1	G	CDS	6599984	6601626	-	MSMEG_RS31555	MSMEG_RS31555
NC_008596.1	6670975	D1	A	CDS	6669518	6672065	+	MSMEG_RS31905	MSMEG_RS31905
NC_008596.1	6673450	D1	T	CDS	6672830	6673973	-	MSMEG_RS31915	MSMEG_RS31915
