# Supplementary material for: ApoE Mimetic Peptide COG1410 Kills Mycobacterium smegmatis via Directly Interfering ClpC’s ATPase Activity
Source: Antibiotics (Basel). 2024 Mar 19;13(3):278. doi: 10.3390/antibiotics13030278 (PMC10967448; doi:10.3390/antibiotics13030278)
Supplement: Supplementary file 1 [file antibiotics-13-00278-s001.zip › Table S4. SNP differences between the wild-type strain and induced mutants.xlsx]

## Sheet: Table S2. SNP differences betwe
chr_id	position	ref_base<->sample_base	snp_status	strand	Annotation_type	Feature_type	codon_phase	codon_mutate	aa_mutate	synonymous	nonsynonymous	pos_start	pos_end	gene_id 30g	gene_id 35g
NC_008596.1	931754	T<->A	Hom	-	Gene	CDS	77 days, 10:00:00	AAC<->TAC;	N<->Y;	0	1	930732	933611	MSMEG_RS04135	MSMEG_RS04135
NC_008596.1	4030171	T<->C	Hom	+	Gene	CDS	26 days, 9:02:00	GTT<->GTC;	V<->V;	1	0	4029539	4030411	MSMEG_RS19190	MSMEG_RS19190
NC_008596.1	2304699	A<->G	Hom	-	Gene	CDS	14 days, 12:02:00	TGT<->TGC;	C<->C;	1	0	2304294	2305046	MSMEG_RS10790
NC_008596.1	4214321	G<->T	Hom	+	Gene	CDS	20 days, 7:00:00	GCC<->TCC;	A<->S;	0	1	4213835	4215222	MSMEG_RS20000	MSMEG_RS20000
NC_008596.1	4214624	G<->T	Hom	+	Gene	CDS	32 days, 22:00:00	GCC<->TCC;	A<->S;	0	1	4213835	4215222	MSMEG_RS20000	MSMEG_RS20000
NC_008596.1	3105561	G<->A	Hom	+	Gene	CDS	35 days, 4:00:00	GGG<->AGG;	G<->R;	0	1	3104718	3105851	MSMEG_RS14730	MSMEG_RS14730
NC_008596.1	3105568	G<->A	Hom	+	Gene	CDS	35 days, 11:01:00	GGC<->GAC;	G<->D;	0	1	3104718	3105851	MSMEG_RS14730	MSMEG_RS14730
NC_008596.1	3105805	T<->C	Hom	+	Gene	CDS	45 days, 8:01:00	CTA<->CCA;	L<->P;	0	1	3104718	3105851	MSMEG_RS14730	MSMEG_RS14730
NC_008596.1	5419351	C<->A	Hom	-	Gene	CDS	4 days, 18:02:00	GTG<->GTT;	V<->V;	1	0	5418154	5419464	MSMEG_RS25690	MSMEG_RS25690
NC_008596.1	3263019	C<->G	Hom	-	Gene	CDS	32 days, 9:02:00	GGG<->GGC;	G<->G;	1	0	3261518	3263795	MSMEG_RS15465	MSMEG_RS15465
NC_008596.1	777783	C<->T	Hom	-	Gene	CDS	65 days, 22:00:00	GGC<->AGC;	G<->S;	0	1	776854	779364	MSMEG_RS03370
NC_008596.1	4158542	A<->G	Hom	-	Gene	CDS	53 days, 9:02:00	TTT<->TTC;	F<->F;	1	0	4158407	4159822	MSMEG_RS19760	MSMEG_RS19760
NC_008596.1	6923330	T<->G	Hom	-	Gene	CDS	30 days, 7:00:00	ACC<->CCC;	T<->P;	0	1	6922554	6924056	MSMEG_RS33145	MSMEG_RS33145
NC_008596.1	6923341	A<->C	Hom	-	Gene	CDS	29 days, 20:01:00	ATC<->AGC;	I<->S;	0	1	6922554	6924056	MSMEG_RS33145	MSMEG_RS33145
NC_008596.1	2117025	T<->G	Hom	+	Gene	CDS	39 days, 10:00:00	TTC<->GTC;	F<->V;	0	1	2116080	2117639	MSMEG_RS09890	MSMEG_RS09890
NC_008596.1	2824358	A<->G	Hom	-	Gene	CDS	31 days, 9:02:00	ACT<->ACC;	T<->T;	1	0	2824118	2825110	MSMEG_RS13350	MSMEG_RS13350
NC_008596.1	6154209	A<->G	Hom	-	Gene	CDS	54 days, 13:00:00	TCC<->CCC;	S<->P;	0	1	6152971	6155517		MSMEG_RS29385
