# Supplementary material for: ApoE Mimetic Peptide COG1410 Kills Mycobacterium smegmatis via Directly Interfering ClpC’s ATPase Activity
Source: Antibiotics (Basel). 2024 Mar 19;13(3):278. doi: 10.3390/antibiotics13030278 (PMC10967448; doi:10.3390/antibiotics13030278)
Supplement: Supplementary file 1 [file antibiotics-13-00278-s001.zip › Table S5. Transcriptome analysis of M. smegmatis treated with sub-MIC COG1410..xlsx]

## Sheet: 表达量差异详情表 (2) Down
Gene_id	Gene name	Gene description	FC(Treated/Control)	Log2FC(Treated/Control)	Pvalue	Padjust	Significant	Regulate	Gene Type	Biotype	wt_1	wt_2	wt_3	T1410_1	T1410_2	T1410_3	Treated	Control
MSMEG_RS30255	MSMEG_RS30255	NAD-glutamate dehydrogenase	0.014	-6.1675	0	0	yes	down	ref_gene	mRNA	704.34	927.23	805.39	10.65	8.44	11.82	10.3033	812.32
MSMEG_RS11875	MSMEG_RS11875	aspartate aminotransferase family protein	0.053	-4.24372	8.15e-102	2e-98	yes	down	ref_gene	mRNA	4897.94	4977.07	4612.8	222.04	218.15	248.7	229.63	4829.27
MSMEG_RS11870	MSMEG_RS11870	CoA-acylating methylmalonate-semialdehyde dehydrogenase	0.042	-4.56848	1.6e-95	2.62e-92	yes	down	ref_gene	mRNA	5373.02	6414.53	5713.26	191.76	216.97	246.8	218.51	5833.6
MSMEG_RS03990	MSMEG_RS03990	M20 family metallo-hydrolase	0.066	-3.91556	1.92e-94	2.35e-91	yes	down	ref_gene	mRNA	85.43	125.26	95.63	6.75	4.69	7.11	6.18333	102.107
MSMEG_RS06800	MSMEG_RS06800	iron-containing alcohol dehydrogenase	0.041	-4.60523	6.91e-85	6.78e-82	yes	down	ref_gene	mRNA	2872.62	2351.04	2551.78	91.94	96.58	98.83	95.7833	2591.81
novel0050	-	iron-containing alcohol dehydrogenase [Mycolicibacterium smegmatis]	0.062	-4.01391	4.18e-70	3.41e-67	yes	down	novel_gene	unknown	270.86	250.57	270.33	15.49	14.41	13.65	14.5167	263.92
novel0105	-	CoA-acylating methylmalonate-semialdehyde dehydrogenase [Mycolicibacterium smegmatis]	0.054	-4.20146	1.2e-66	8.4e-64	yes	down	novel_gene	unknown	379.46	417.55	401.21	15.66	19.45	22.42	19.1767	399.407
MSMEG_RS03985	MSMEG_RS03985	MFS transporter	0.085	-3.5636	1.6e-57	9.78e-55	yes	down	ref_gene	mRNA	58.85	98.7	75.85	5.77	5.11	6.77	5.88333	77.8
novel0106	-	aspartate aminotransferase family protein [Mycolicibacterium smegmatis]	0.063	-3.98684	7.93e-55	4.32e-52	yes	down	novel_gene	unknown	342.6	364.95	347.05	17.22	21.31	19.42	19.3167	351.533
MSMEG_RS03995	MSMEG_RS03995	amidase	0.102	-3.29302	1.29e-53	6.32e-51	yes	down	ref_gene	mRNA	43.91	68.89	55.36	5.26	3.79	6.6	5.21667	56.0533
novel0107	-	aspartate aminotransferase family protein [Mycolicibacterium smegmatis]	0.073	-3.77157	4.56e-51	2.03e-48	yes	down	novel_gene	unknown	337.3	318.57	297.23	19.33	21.05	21.25	20.5433	317.7
MSMEG_RS06815	MSMEG_RS06815	DUF3558 domain-containing protein	0.173	-2.53021	5.24e-26	1.98e-23	yes	down	ref_gene	mRNA	256.13	169.44	227.47	45.52	27.93	32.43	35.2933	217.68
MSMEG_RS19165	MSMEG_RS19165	glycosyl hydrolase family 65 protein	0.367	-1.44684	1.41e-23	4.61e-21	yes	down	ref_gene	mRNA	38.5	44.41	42.2	14.51	11.92	15.38	13.9367	41.7033
MSMEG_RS29805	MSMEG_RS29805	MFS transporter	0.303	-1.72354	4.28e-18	1.1e-15	yes	down	ref_gene	mRNA	27.39	33.4	30.88	8.01	7.5	9.44	8.31667	30.5567
MSMEG_RS15545	nadC	carboxylating nicotinate-nucleotide diphosphorylase	0.436	-1.19613	1.57e-17	3.67e-15	yes	down	ref_gene	mRNA	200.19	234.2	198.44	95.07	69.37	88.78	84.4067	210.943
MSMEG_RS08215	MSMEG_RS08215	cytosine permease	0.391	-1.3533	1.68e-17	3.74e-15	yes	down	ref_gene	mRNA	496.23	437.6	454.56	199.35	131.94	173.99	168.427	462.797
MSMEG_RS19135	MSMEG_RS19135	1-phosphofructokinase family hexose kinase	0.485	-1.04436	8.43e-17	1.72e-14	yes	down	ref_gene	mRNA	62.08	82.45	76.79	37.61	27.22	32.91	32.58	73.7733
MSMEG_RS15530	nrtR	DNA-binding transcriptional regulator NrtR	0.411	-1.28349	1.4e-16	2.76e-14	yes	down	ref_gene	mRNA	294.98	362.94	302.53	130.51	101.33	123.93	118.59	320.15
MSMEG_RS10225	MSMEG_RS10225	DUF4185 domain-containing protein	0.422	-1.24552	2.9e-16	5.26e-14	yes	down	ref_gene	mRNA	79.11	74.14	76.43	36.1	23.1	30.83	30.01	76.56
MSMEG_RS25710	MSMEG_RS25710	acetamidase/formamidase family protein	0.268	-1.89942	6.33e-16	1.07e-13	yes	down	ref_gene	mRNA	35.35	61.62	43.64	11.69	10.06	11.96	11.2367	46.87
MSMEG_RS19060	MSMEG_RS19060	Hsp20/alpha crystallin family protein	0.419	-1.25573	1.7e-15	2.77e-13	yes	down	ref_gene	mRNA	6122.87	7219.16	6571.33	2623.22	2186.75	2550.66	2453.54	6637.79
MSMEG_RS19090	MSMEG_RS19090	universal stress protein	0.373	-1.42083	3.07e-15	4.86e-13	yes	down	ref_gene	mRNA	100.92	140.26	118.2	43.14	36.99	39.9	40.01	119.793
MSMEG_RS10095	MSMEG_RS10095	oxidoreductase	0.378	-1.40232	1.74e-14	2.58e-12	yes	down	ref_gene	mRNA	1146.28	934.21	1053.98	399.2	302.17	389.77	363.713	1044.82
MSMEG_RS25010	tet(V)	tetracycline efflux MFS transporter Tet(V)	0.436	-1.19914	3.13e-14	4.52e-12	yes	down	ref_gene	mRNA	45.2	46.05	46.46	23.64	14.08	18.03	18.5833	45.9033
MSMEG_RS19095	MSMEG_RS19095	universal stress protein	0.498	-1.00492	1.41e-13	1.87e-11	yes	down	ref_gene	mRNA	277.96	341.16	320.01	154.61	122.92	144.36	140.63	313.043
MSMEG_RS03165	MSMEG_RS03165	hypothetical protein	0.383	-1.38368	2.44e-13	3.15e-11	yes	down	ref_gene	mRNA	55.97	53.43	65.81	23.55	17.02	20.38	20.3167	58.4033
MSMEG_RS19055	MSMEG_RS19055	4Fe-4S dicluster domain-containing protein	0.393	-1.34639	4.07e-13	5.12e-11	yes	down	ref_gene	mRNA	390.19	425.84	388.85	141.21	133.32	151.26	141.93	401.627
MSMEG_RS19050	MSMEG_RS19050	FAD/NAD(P)-binding protein	0.371	-1.43189	1.23e-12	1.44e-10	yes	down	ref_gene	mRNA	88.93	104.37	95.19	30.65	29.63	35.09	31.79	96.1633
MSMEG_RS19040	MSMEG_RS19040	Ni/Fe hydrogenase subunit alpha	0.437	-1.19515	2.37e-12	2.59e-10	yes	down	ref_gene	mRNA	74.34	93.84	82.8	34.6	30.08	33.92	32.8667	83.66
MSMEG_RS19045	MSMEG_RS19045	oxidoreductase	0.39	-1.35748	3.48e-12	3.63e-10	yes	down	ref_gene	mRNA	134.33	167.01	133.18	52.96	46.68	52.19	50.61	144.84
MSMEG_RS22440	MSMEG_RS22440	sugar phosphate isomerase/epimerase	0.308	-1.69937	4.85e-12	4.96e-10	yes	down	ref_gene	mRNA	50.16	88.09	61.43	18.57	16.79	19.15	18.17	66.56
MSMEG_RS29800	dgoD	galactonate dehydratase	0.252	-1.98807	5.6e-12	5.61e-10	yes	down	ref_gene	mRNA	37.11	46.51	37.13	7.44	9.61	9.62	8.89	40.25
MSMEG_RS02655	MSMEG_RS02655	class I SAM-dependent methyltransferase	0.422	-1.24359	6.42e-12	6.3e-10	yes	down	ref_gene	mRNA	26.32	31.11	34.71	14.96	8.22	12.82	12	30.7133
MSMEG_RS33290	MSMEG_RS33290	inositol-3-phosphate synthase	0.319	-1.64731	1.6e-11	1.48e-09	yes	down	ref_gene	mRNA	524.04	326.29	423.78	155.17	96.41	131.21	127.597	424.703
MSMEG_RS15855	MSMEG_RS15855	glucose 1-dehydrogenase	0.47	-1.0887	1.73e-11	1.57e-09	yes	down	ref_gene	mRNA	53.23	54.3	55.67	28.48	16.73	26.02	23.7433	54.4
MSMEG_RS30260	MSMEG_RS30260	SHOCT domain-containing protein	0.442	-1.17742	1.88e-11	1.68e-09	yes	down	ref_gene	mRNA	125.71	142.28	146.61	67.73	44.47	51.45	54.55	138.2
MSMEG_RS19085	MSMEG_RS19085	hypothetical protein	0.395	-1.34186	8e-11	6.33e-09	yes	down	ref_gene	mRNA	183.98	257.65	199.4	79.22	69.83	73.36	74.1367	213.677
MSMEG_RS22435	MSMEG_RS22435	Gfo/Idh/MocA family oxidoreductase	0.337	-1.57015	1.7e-10	1.26e-08	yes	down	ref_gene	mRNA	58.4	102.65	78.03	22.91	23.02	24.89	23.6067	79.6933
MSMEG_RS19155	MSMEG_RS19155	hypothetical protein	0.441	-1.18047	2.71e-10	1.98e-08	yes	down	ref_gene	mRNA	59.9	61.72	70.01	26.77	23.5	25.57	25.28	63.8767
MSMEG_RS20965	MSMEG_RS20965	SDR family oxidoreductase	0.477	-1.0694	7.55e-10	5.45e-08	yes	down	ref_gene	mRNA	52.6	56.23	53.77	25.83	18.65	26.23	23.57	54.2
MSMEG_RS31125	MSMEG_RS31125	SulP family inorganic anion transporter	0.444	-1.17052	9.88e-10	7e-08	yes	down	ref_gene	mRNA	17.13	16.34	16.64	8.75	4.63	7.62	7	16.7033
MSMEG_RS01540	eda	bifunctional 4-hydroxy-2-oxoglutarate aldolase/2-dehydro-3-deoxy-phosphogluconate aldolase	0.464	-1.10625	9.99e-10	7e-08	yes	down	ref_gene	mRNA	115.4	99.11	111.31	54.4	36.7	48.36	46.4867	108.607
MSMEG_RS15860	MSMEG_RS15860	sugar-binding domain-containing protein	0.473	-1.08083	1.41e-09	9.77e-08	yes	down	ref_gene	mRNA	31.5	30.97	35.46	15.93	10.45	16.31	14.23	32.6433
MSMEG_RS27255	MSMEG_RS27255	nitrilase family protein	0.38	-1.39778	2.11e-09	1.42e-07	yes	down	ref_gene	mRNA	99.19	154.04	116.8	39.57	40.8	43.33	41.2333	123.343
MSMEG_RS15865	eltD	erythritol/L-threitol dehyrogenase	0.439	-1.18926	9.16e-09	5.35e-07	yes	down	ref_gene	mRNA	79.18	64.78	70.27	36.98	19.46	32.49	29.6433	71.41
MSMEG_RS15705	MSMEG_RS15705	cytochrome ubiquinol oxidase subunit I	0.494	-1.01849	9.33e-09	5.39e-07	yes	down	ref_gene	mRNA	2109.61	2584.82	2243.75	1049.33	975.74	1047.05	1024.04	2312.73
MSMEG_RS08210	MSMEG_RS08210	NAD(P)/FAD-dependent oxidoreductase	0.495	-1.01549	1.16e-08	6.41e-07	yes	down	ref_gene	mRNA	797.13	649.69	705.11	396.83	257.34	337.89	330.687	717.31
MSMEG_RS27260	hisD	histidinol dehydrogenase	0.442	-1.179	1.2e-08	6.46e-07	yes	down	ref_gene	mRNA	135.53	225.36	172.56	71.13	65.02	73.64	69.93	177.817
MSMEG_RS15700	cydB	cytochrome d ubiquinol oxidase subunit II	0.468	-1.09692	1.98e-08	1.05e-06	yes	down	ref_gene	mRNA	1299.87	1506.94	1323.23	562.97	560.5	600.84	574.77	1376.68
MSMEG_RS19130	MSMEG_RS19130	wax ester/triacylglycerol synthase family O-acyltransferase	0.488	-1.03433	2.46e-08	1.24e-06	yes	down	ref_gene	mRNA	142.4	211.74	165.85	77.62	68.54	81.61	75.9233	173.33
MSMEG_RS09560	mimR	transcriptional regulator MimR	0.476	-1.07215	3.11e-08	1.53e-06	yes	down	ref_gene	mRNA	9.03	10.56	10.32	4.97	3.11	5.1	4.39333	9.97
MSMEG_RS19030	pma1	cation-transporting ATPase Pma1	0.481	-1.0549	3.86e-08	1.87e-06	yes	down	ref_gene	mRNA	91.55	121.09	102.44	44.77	43.72	47.26	45.25	105.027
MSMEG_RS16085	MSMEG_RS16085	MFS transporter	0.485	-1.04392	6.13e-08	2.81e-06	yes	down	ref_gene	mRNA	82.62	65.72	80.53	41.89	27.77	33.25	34.3033	76.29
MSMEG_RS22430	MSMEG_RS22430	phytanoyl-CoA dioxygenase family protein	0.386	-1.37435	1.16e-07	4.82e-06	yes	down	ref_gene	mRNA	23.33	43.1	34.2	11.4	11.27	11.5	11.39	33.5433
MSMEG_RS19080	MSMEG_RS19080	universal stress protein	0.434	-1.20534	1.32e-07	5.27e-06	yes	down	ref_gene	mRNA	50.01	80.06	54.32	24.18	20.03	27.83	24.0133	61.4633
MSMEG_RS06720	MSMEG_RS06720	FGGY family carbohydrate kinase	0.466	-1.10259	1.45e-07	5.59e-06	yes	down	ref_gene	mRNA	14.45	19.1	19.85	7.96	5.44	9.33	7.57667	17.8
MSMEG_RS08485	MSMEG_RS08485	ferredoxin reductase	0.459	-1.12393	1.68e-07	6.39e-06	yes	down	ref_gene	mRNA	662.13	871.51	655.38	302.04	297.57	294.31	297.973	729.673
MSMEG_RS22445	MSMEG_RS22445	Gfo/Idh/MocA family oxidoreductase	0.488	-1.03402	2.29e-07	8.2e-06	yes	down	ref_gene	mRNA	45.31	67.28	50.57	25.96	21.02	24.7	23.8933	54.3867
MSMEG_RS27250	MSMEG_RS27250	cytosine permease	0.388	-1.36692	3.25e-07	1.15e-05	yes	down	ref_gene	mRNA	69.21	112.67	85.9	25.24	30.82	35.08	30.38	89.26
MSMEG_RS19780	MSMEG_RS19780	MFS transporter	0.338	-1.5669	4.51e-07	1.55e-05	yes	down	ref_gene	mRNA	286.68	147.04	204.11	96.71	44.65	67.27	69.5433	212.61
novel0137	-	Hsp20/alpha crystallin family protein [Mycolicibacterium smegmatis]	0.462	-1.11508	1.1e-06	3.48e-05	yes	down	novel_gene	unknown	415.25	476.75	448.18	160.35	172.34	206.04	179.577	446.727
MSMEG_RS08575	lat	L-lysine 6-transaminase	0.341	-1.55054	2.07e-06	6.16e-05	yes	down	ref_gene	mRNA	145.61	335.69	206.47	55.73	72.93	74.42	67.6933	229.257
MSMEG_RS18665	MSMEG_RS18665	LLM class flavin-dependent oxidoreductase	0.421	-1.24906	2.53e-06	7.42e-05	yes	down	ref_gene	mRNA	38.47	25.55	29.12	15.84	9.6	11.53	12.3233	31.0467
MSMEG_RS19770	MSMEG_RS19770	LLM class flavin-dependent oxidoreductase	0.372	-1.42664	1.48e-05	0.000366766	yes	down	ref_gene	mRNA	239.19	113.15	158.2	83.18	40.73	59.98	61.2967	170.18
MSMEG_RS12860	MSMEG_RS12860	SfnB family sulfur acquisition oxidoreductase	0.433	-1.20787	1.57e-05	0.00038012	yes	down	ref_gene	mRNA	182.19	107.55	129.04	75.73	38.73	59.59	58.0167	139.593
MSMEG_RS18670	MSMEG_RS18670	ABC transporter substrate-binding protein	0.464	-1.1081	1.59e-05	0.000382225	yes	down	ref_gene	mRNA	40.95	28.19	36.07	18.77	10.52	16.78	15.3567	35.07
MSMEG_RS08490	MSMEG_RS08490	acyl-CoA desaturase	0.456	-1.13318	1.69e-05	0.000400288	yes	down	ref_gene	mRNA	940.22	1489.77	997.66	408.76	482.52	479.83	457.037	1142.55
novel0133	-	hypothetical protein MAAFP003_4092, partial [Mycobacterium ahvazicum]	0.457	-1.12861	1.7e-05	0.000400288	yes	down	novel_gene	unknown	162.72	182.11	123.12	86.28	58.47	51.49	65.4133	155.983
MSMEG_RS33285	MSMEG_RS33285	PadR family transcriptional regulator	0.453	-1.14256	1.74e-05	0.000409395	yes	down	ref_gene	mRNA	127.11	86.19	112.3	65.54	32.43	41.58	46.5167	108.533
MSMEG_RS19775	MSMEG_RS19775	LLM class flavin-dependent oxidoreductase	0.347	-1.52574	1.88e-05	0.000436091	yes	down	ref_gene	mRNA	183.91	85.99	121.24	59.71	28.09	43.39	43.73	130.38
MSMEG_RS17550	MSMEG_RS17550	GlsB/YeaQ/YmgE family stress response membrane protein	0.465	-1.10443	2.25e-05	0.00050961	yes	down	ref_gene	mRNA	1859.49	2651.69	2012.75	784.58	924.1	847.83	852.17	2174.64
MSMEG_RS15870	MSMEG_RS15870	extracellular solute-binding protein	0.476	-1.06989	2.43e-05	0.000539799	yes	down	ref_gene	mRNA	92.11	61.76	72.63	46.6	23.48	33	34.36	75.5
novel0216	-	transposase [Mycolicibacterium smegmatis]	0.47	-1.08932	3.29e-05	0.000704415	yes	down	novel_gene	unknown	193.5	196.6	192.63	103.5	64.52	66.33	78.1167	194.243
MSMEG_RS06200	MSMEG_RS06200	metallophosphoesterase	0.481	-1.05442	3.41e-05	0.000727371	yes	down	ref_gene	mRNA	71.59	129.94	95.97	40.42	42.02	43.08	41.84	99.1667
MSMEG_RS19760	MSMEG_RS19760	LLM class flavin-dependent oxidoreductase	0.403	-1.31086	4.64e-05	0.000952002	yes	down	ref_gene	mRNA	221.26	113.86	145.11	88.56	39.37	60.6	62.8433	160.077
MSMEG_RS17810	MSMEG_RS17810	hypothetical protein	0.494	-1.01887	5.13e-05	0.00103227	yes	down	ref_gene	mRNA	17.18	16.17	14.4	7.89	6.24	7.44	7.19	15.9167
MSMEG_RS12905	ald	alanine dehydrogenase	0.333	-1.58835	6.26e-05	0.00122799	yes	down	ref_gene	mRNA	452.67	1252.52	704.68	164.21	276.85	231.63	224.23	803.29
MSMEG_RS15875	MSMEG_RS15875	sugar ABC transporter permease	0.497	-1.00737	6.53e-05	0.00127693	yes	down	ref_gene	mRNA	65.57	45.62	51.36	31.96	18.17	26.27	25.4667	54.1833
MSMEG_RS17315	bfr	bacterioferritin	0.491	-1.02688	7e-05	0.00134751	yes	down	ref_gene	mRNA	1411.25	2511.55	1793.01	743.57	834.05	821.24	799.62	1905.27
MSMEG_RS00245	MSMEG_RS00245	WhiB family transcriptional regulator	0.484	-1.04733	7.07e-05	0.00135474	yes	down	ref_gene	mRNA	33.85	57.17	49.52	21.83	16.78	20.83	19.8133	46.8467
MSMEG_RS12865	MSMEG_RS12865	LLM class flavin-dependent oxidoreductase	0.484	-1.04782	7.42e-05	0.00139958	yes	down	ref_gene	mRNA	356.8	216.45	269.48	171.69	87.85	130.56	130.033	280.91
MSMEG_RS19765	MSMEG_RS19765	acyl-CoA dehydrogenase family protein	0.401	-1.31737	0.00011907	0.00208627	yes	down	ref_gene	mRNA	140.62	65.79	96.38	56.09	25.28	36.76	39.3767	100.93
MSMEG_RS18760	MSMEG_RS18760	TauD/TfdA family dioxygenase	0.498	-1.00546	0.000141817	0.00243271	yes	down	ref_gene	mRNA	113.67	74.69	97.44	61.05	27.73	47.71	45.4967	95.2667
MSMEG_RS21215	MSMEG_RS21215	ABC transporter substrate-binding protein	0.493	-1.02151	0.000369561	0.00534828	yes	down	ref_gene	mRNA	37.23	21.71	32	18.91	9.51	14.4	14.2733	30.3133
MSMEG_RS17310	MSMEG_RS17310	MDR family MFS transporter	0.498	-1.00638	0.000585	0.00782019	yes	down	ref_gene	mRNA	27.64	57.06	37.75	16.11	18.14	19.17	17.8067	40.8167
MSMEG_RS11910	MSMEG_RS11910	LLM class flavin-dependent oxidoreductase	0.467	-1.09985	0.000813796	0.0104515	yes	down	ref_gene	mRNA	36.48	80.57	58.65	19.23	24.49	26.92	23.5467	58.5667
MSMEG_RS11920	MSMEG_RS11920	ABC transporter substrate-binding protein	0.486	-1.03987	0.00150182	0.0173363	yes	down	ref_gene	mRNA	56.95	113.56	86.98	27.63	39.66	39.86	35.7167	85.83
MSMEG_RS11935	MSMEG_RS11935	ABC transporter permease subunit	0.491	-1.02654	0.00189035	0.0205178	yes	down	ref_gene	mRNA	34.45	58.9	44.07	15.47	21.67	20.64	19.26	45.8067
MSMEG_RS15900	derI1	D-erythrulose 4-phosphate isomerase DerI1	0.489	-1.03329	0.00197446	0.0211963	yes	down	ref_gene	mRNA	68.38	44.2	46.74	33.14	15.21	26.08	24.81	53.1067
MSMEG_RS10530	MSMEG_RS10530	CoA transferase	0.5	-1.00003	0.00300112	0.0296247	yes	down	ref_gene	mRNA	30.08	74.23	42.14	19.93	21.81	21.99	21.2433	48.8167
MSMEG_RS08065	MSMEG_RS08065	homoserine O-acetyltransferase	4.521	2.17675	8.71e-28	3.56e-25	yes	up	ref_gene	mRNA	34.77	31.36	32.37	194.44	89.18	139.87	141.163	32.8333
MSMEG_RS32550	MSMEG_RS32550	SDR family oxidoreductase	2.805	1.48799	2.19e-24	7.68e-22	yes	up	ref_gene	mRNA	59.8	66.7	60.64	209.87	110.52	171.08	163.823	62.38
MSMEG_RS08060	MSMEG_RS08060	class I SAM-dependent methyltransferase	4.559	2.18873	2.23e-23	6.82e-21	yes	up	ref_gene	mRNA	22.49	20.5	24.25	140.32	59.76	91.13	97.07	22.4133
MSMEG_RS04290	groL	chaperonin GroEL	3.268	1.70837	1.56e-21	4.5e-19	yes	up	ref_gene	mRNA	341.64	478.26	349.37	1603.02	802.72	1179.14	1194.96	389.757
MSMEG_RS08070	MSMEG_RS08070	bifunctional o-acetylhomoserine/o-acetylserine sulfhydrylase	2.686	1.42529	5.03e-20	1.37e-17	yes	up	ref_gene	mRNA	51.78	49.48	53.53	172.73	91.77	125.87	130.123	51.5967
MSMEG_RS27665	car	carboxylic acid reductase	2.119	1.08348	9.57e-18	2.35e-15	yes	up	ref_gene	mRNA	17.93	25.71	22.34	50.61	33.05	44.96	42.8733	21.9933
novel0026	-	chaperonin GroL [Mycolicibacterium smegmatis MKD8]	3.244	1.69774	6.99e-17	1.49e-14	yes	up	novel_gene	unknown	46.43	73.71	49.04	220.99	117.19	167.59	168.59	56.3933
MSMEG_RS07740	groL	chaperonin GroEL	2.68	1.42244	3.46e-16	6.07e-14	yes	up	ref_gene	mRNA	124.24	173.24	123.97	456.17	248.29	349.92	351.46	140.483
MSMEG_RS33470	MSMEG_RS33470	hypothetical protein	2.274	1.18493	3.23e-15	4.96e-13	yes	up	ref_gene	mRNA	1253.37	2039.04	1590.36	4146.67	2104.85	2355.6	2869.04	1627.59
novel0167	-	zinc-binding dehydrogenase [Mycolicibacterium smegmatis]	2.272	1.18386	1.26e-13	1.72e-11	yes	up	novel_gene	unknown	103.74	122.28	106.85	298.47	166.87	218.99	228.11	110.957
novel0027	-	TCP-1/cpn60 chaperonin family protein [Mycobacterium xenopi 3993]	4.04	2.01453	4.36e-13	5.35e-11	yes	up	novel_gene	unknown	176.05	263.18	257.55	907.22	440.94	710.85	686.337	232.26
MSMEG_RS03025	MSMEG_RS03025	ESX secretion-associated protein EspG	3.149	1.65509	2.24e-12	2.5e-10	yes	up	ref_gene	mRNA	14.44	12.92	12.73	54.81	25.78	39.01	39.8667	13.3633
MSMEG_RS21575	MSMEG_RS21575	cutinase family protein	2.247	1.16827	3.22e-12	3.43e-10	yes	up	ref_gene	mRNA	205.57	293.92	207.21	599.44	365.73	494.45	486.54	235.567
MSMEG_RS05425	MSMEG_RS05425	SDR family oxidoreductase	2.073	1.05189	9.85e-12	9.47e-10	yes	up	ref_gene	mRNA	99.88	124.72	98.56	264.77	146.79	210.74	207.433	107.72
novel0209	-	PLP-dependent cysteine synthase family protein [Mycolicibacterium smegmatis]	2.017	1.01223	1.39e-11	1.31e-09	yes	up	novel_gene	unknown	587.15	808.5	638.29	1565.44	992.47	1153.96	1237.29	677.98
MSMEG_RS03000	MSMEG_RS03000	type VII secretion protein EccC	2.719	1.44326	1.11e-10	8.68e-09	yes	up	ref_gene	mRNA	4.23	6.73	7.77	21.5	9.8	16.24	15.8467	6.24333
MSMEG_RS26110	efeB	iron uptake transporter deferrochelatase/peroxidase subunit	2.924	1.54804	1.49e-10	1.14e-08	yes	up	ref_gene	mRNA	16.16	12.16	16.83	58.45	26.52	40.62	41.8633	15.05
MSMEG_RS33475	MSMEG_RS33475	hypothetical protein	2.094	1.06603	3.47e-09	2.3e-07	yes	up	ref_gene	mRNA	336.01	554.93	416.78	1009.18	533.17	637.57	726.64	435.907
MSMEG_RS32560	MSMEG_RS32560	aromatic alcohol reductase	2.114	1.08009	5.02e-09	3.24e-07	yes	up	ref_gene	mRNA	88.61	90.55	78.06	233.05	113.12	169.75	171.973	85.74
MSMEG_RS07735	groES	co-chaperone GroES	2.242	1.16504	2.08e-08	1.08e-06	yes	up	ref_gene	mRNA	1429.15	2709.87	1758.55	5581.06	2608.61	3369.05	3852.91	1965.86
MSMEG_RS21580	MSMEG_RS21580	sugar ABC transporter permease	2.001	1.00088	2.81e-08	1.41e-06	yes	up	ref_gene	mRNA	9.8	16.71	14.67	28.14	20.04	26.63	24.9367	13.7267
MSMEG_RS03040	eccE	type VII secretion protein EccE	2.542	1.34589	7.52e-08	3.35e-06	yes	up	ref_gene	mRNA	5	8.04	9.15	23.49	11.33	17.43	17.4167	7.39667
MSMEG_RS08520	MSMEG_RS08520	LLM class F420-dependent oxidoreductase	2.148	1.10298	1.3e-07	5.23e-06	yes	up	ref_gene	mRNA	16.92	23.57	17.87	52.83	26.42	37.76	39.0033	19.4533
MSMEG_RS13525	MSMEG_RS13525	PPOX class F420-dependent oxidoreductase	2.223	1.15268	2.08e-07	7.55e-06	yes	up	ref_gene	mRNA	150.07	132	130.54	389.7	173.3	297.75	286.917	137.537
MSMEG_RS03010	MSMEG_RS03010	PPE family protein	2.815	1.49313	3.65e-07	1.27e-05	yes	up	ref_gene	mRNA	2.36	4.03	5.41	12.19	6.77	11.48	10.1467	3.93333
MSMEG_RS01490	MSMEG_RS01490	NAD(P)-dependent alcohol dehydrogenase	2.274	1.18496	6.49e-07	2.17e-05	yes	up	ref_gene	mRNA	29.03	21.78	29.35	81.75	35.3	57.34	58.13	26.72
MSMEG_RS03030	eccD	type VII secretion integral membrane protein EccD	2.811	1.49113	1.7e-06	5.16e-05	yes	up	ref_gene	mRNA	3	6.04	7.69	16.46	9.42	16.95	14.2767	5.57667
MSMEG_RS03035	mycP3	type VII secretion system ESX-3 serine protease mycosin MycP3	2.477	1.30845	2.15e-06	6.37e-05	yes	up	ref_gene	mRNA	3.89	7.91	8.97	18.46	11.41	16.7	15.5233	6.92333
MSMEG_RS21780	MSMEG_RS21780	non-ribosomal peptide synthetase	2.695	1.43024	5.21e-06	0.00014373	yes	up	ref_gene	mRNA	2.06	5.68	5.42	13.97	7.38	11.06	10.8033	4.38667
MSMEG_RS11125	MSMEG_RS11125	NAD(P)H-dependent oxidoreductase	2.356	1.23618	5.69e-06	0.00015331	yes	up	ref_gene	mRNA	13.37	29.47	19.96	52.4	34.32	46.12	44.28	20.9333
MSMEG_RS04955	MSMEG_RS04955	NAD(P)H-dependent oxidoreductase	2.356	1.23618	5.69e-06	0.00015331	yes	up	ref_gene	mRNA	13.37	29.47	19.96	52.4	34.32	46.12	44.28	20.9333
MSMEG_RS07750	MSMEG_RS07750	serine hydrolase domain-containing protein	2.153	1.10609	7.07e-06	0.000184515	yes	up	ref_gene	mRNA	6.96	15.96	12.51	28.88	17.53	23.11	23.1733	11.81
MSMEG_RS22015	MSMEG_RS22015	iron chelate uptake ABC transporter family permease subunit	2.035	1.02496	3.51e-05	0.000746067	yes	up	ref_gene	mRNA	19.88	17.14	18.41	52.02	22.8	32.64	35.82	18.4767
MSMEG_RS03015	esxG	type VII secretion system protein EsxG	3.611	1.85233	4.87e-05	0.0009832	yes	up	ref_gene	mRNA	40.43	19.97	17.25	125.85	53.41	90.83	90.03	25.8833
MSMEG_RS21775	MSMEG_RS21775	non-ribosomal peptide synthetase	2.392	1.25847	0.000389274	0.00560561	yes	up	ref_gene	mRNA	1.52	4.75	4.68	10.11	5.55	8.12	7.92667	3.65
MSMEG_RS21770	mbtG	NADPH-dependent L-lysine N(6)-monooxygenase MbtG	2.65	1.40583	0.000426851	0.00601763	yes	up	ref_gene	mRNA	1.75	5.64	5.87	13.62	7.09	11.15	10.62	4.42
