# Supplementary figures and images for: ApoE Mimetic Peptide COG1410 Kills Mycobacterium smegmatis via Directly Interfering ClpC’s ATPase Activity
Source: MDPI journal article supplement (doi:10.3390/antibiotics13030278), 2024-03-19

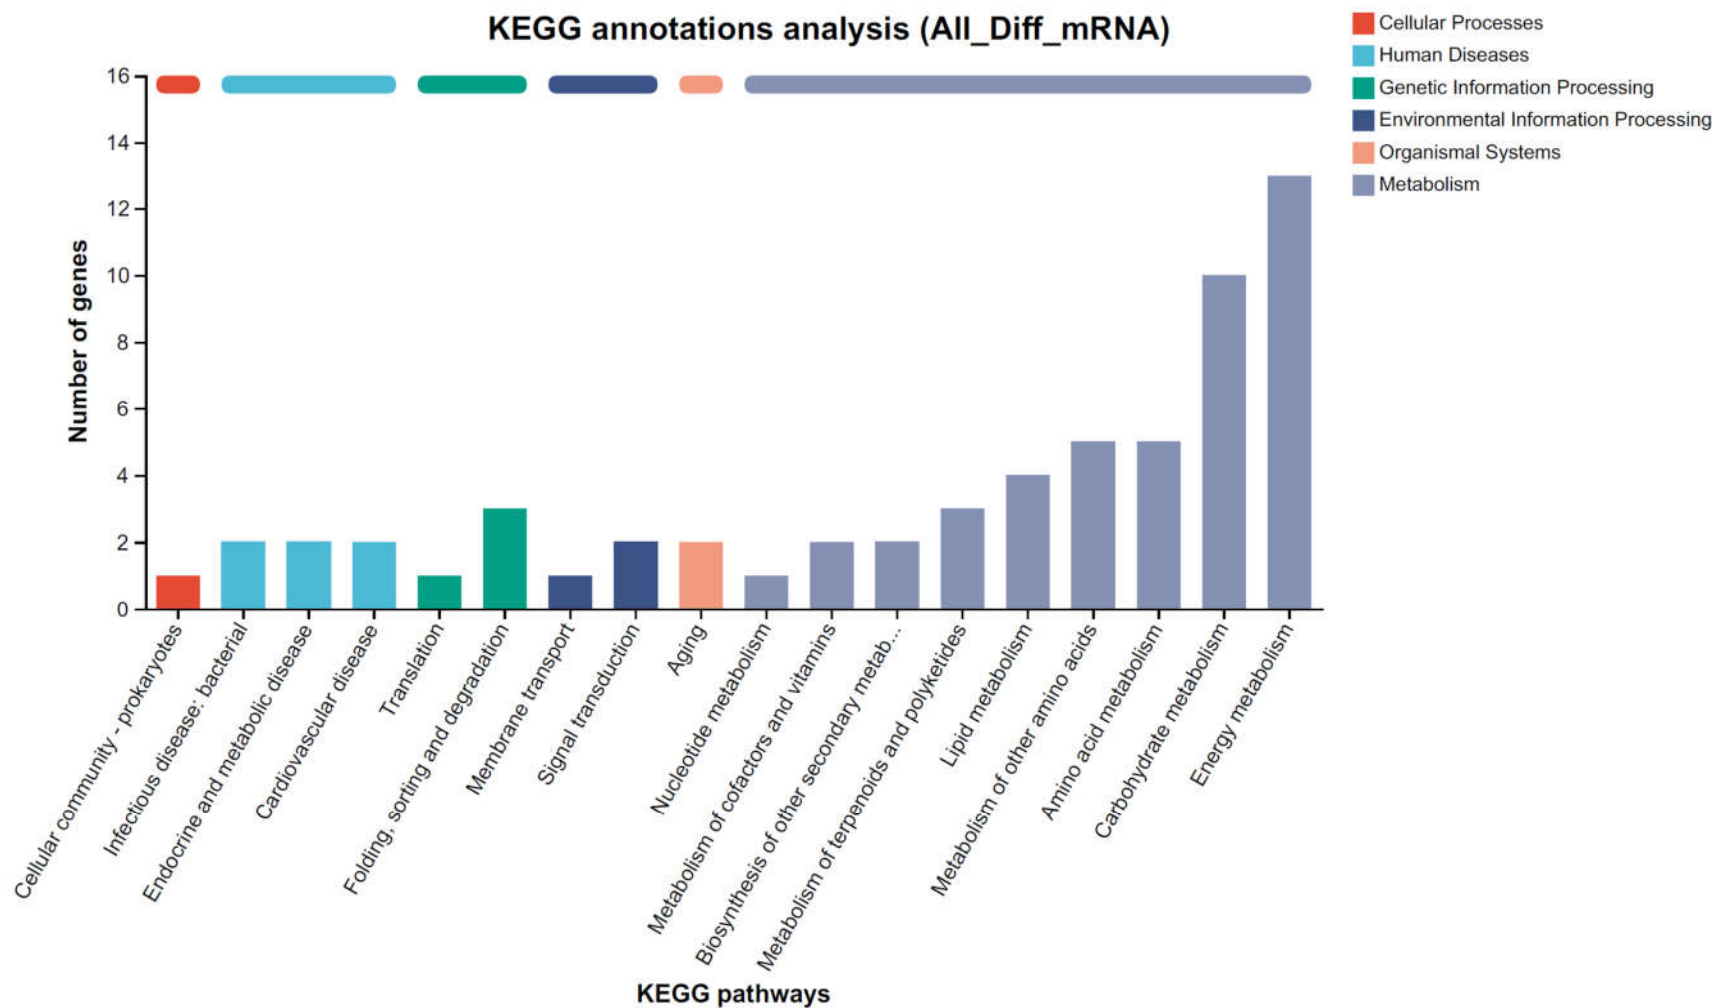

**Figure S1.** KEGG analysis of DEGs affected by COG1410 in *M. smegmatis*.

Supplement: s1 [file s1]
